# Supplementary material for: Effects of Walking Speed and Added Mass on Hip Joint Quasi-Stiffness in Healthy Young and Middle-Aged Adults
Source: MDPI journal article supplement (doi:10.3390/s23094517), 2023-05-06
Supplement: s1 [file s1]

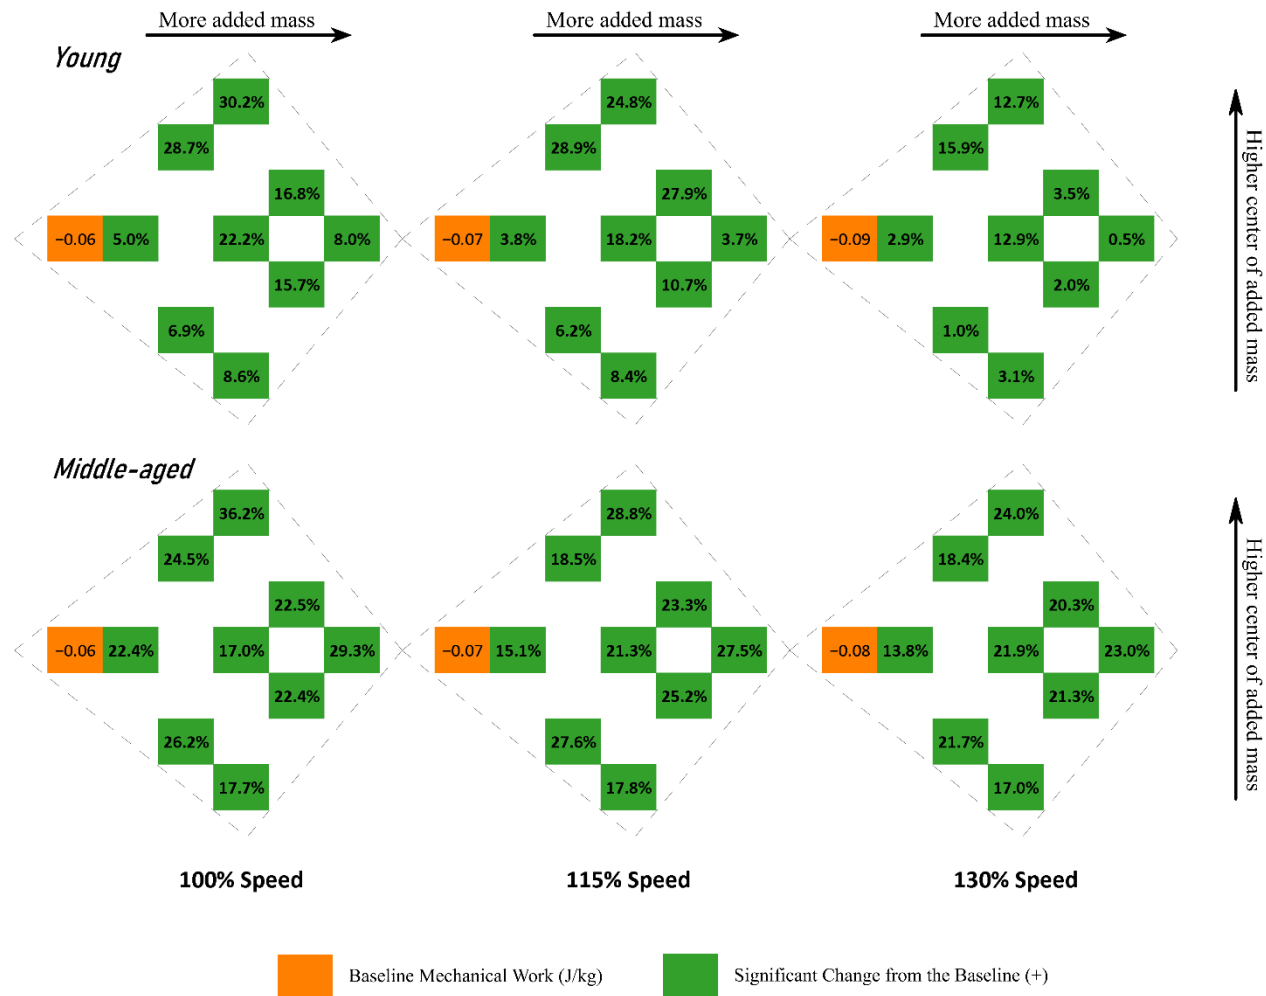

**Figure S1.** Changes in the sagittal plane hip joint mechanical work ( $W_{EX}$ ) during hip extension. Results for young adults are located in the first row. Results for middle-aged adults are located in the second row. Results for walking at different speeds (100, 115, and 130%) are located in the columns. Baseline conditions are highlighted in orange with a unit of J/kg. Other values are relative differences with respect to the baseline value within the same cluster. Comparisons that are statistically significant ( $p < 0.05$ ) are in bold with a green background for a positive (+) change. Within each cluster, added mass conditions with a higher total amount of added mass sit further to the right, and those with a higher center of added mass sit further away from the bottom.

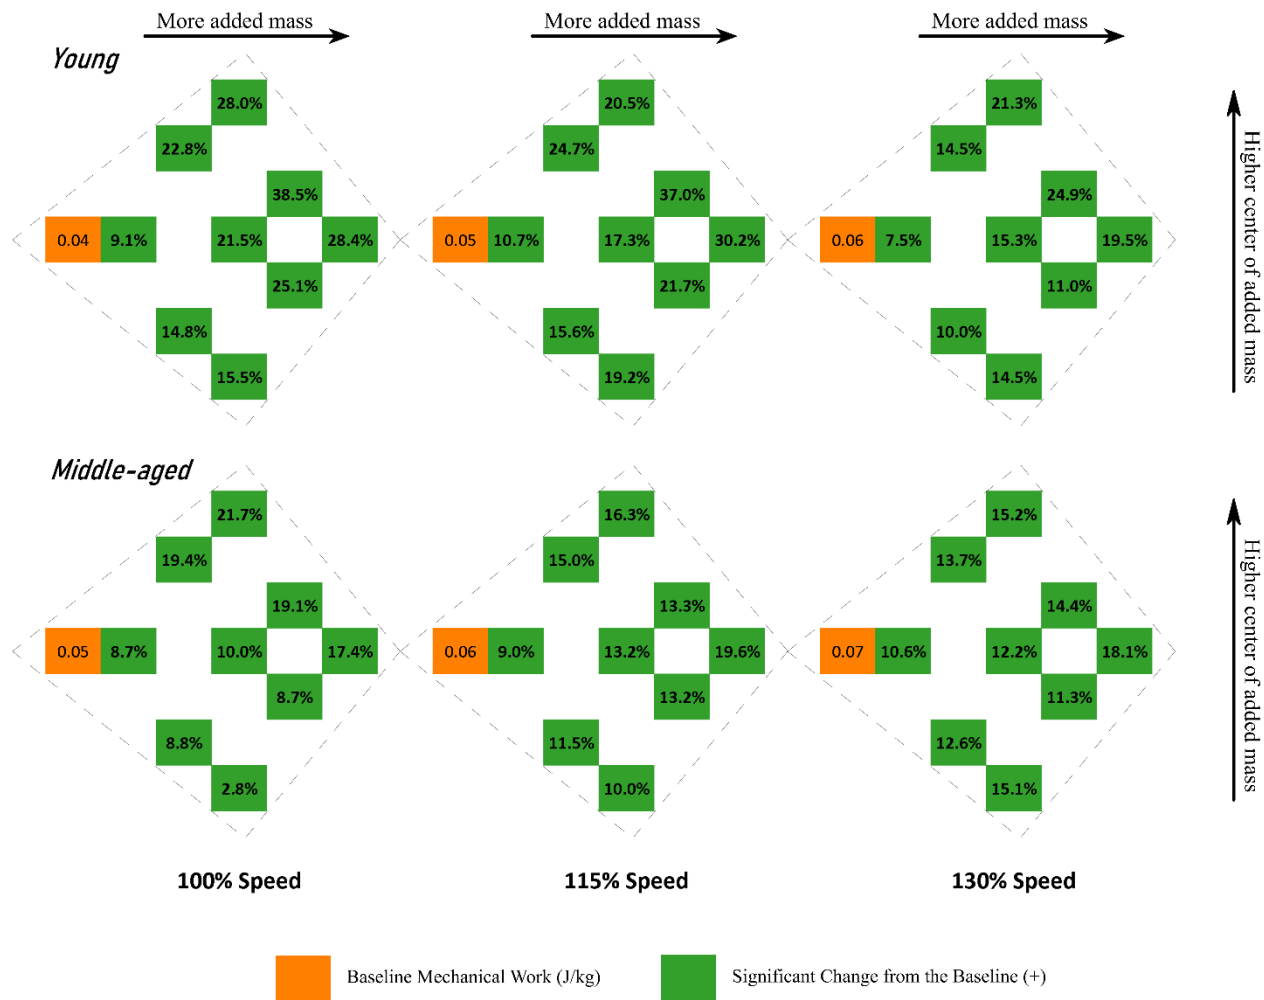

**Figure S2.** Changes in the sagittal plane hip joint mechanical work ( $W_{FL}$ ) during hip flexion. Results for young adults are located in the first row. Results for middle-aged adults are located in the second row. Results for walking at different speeds (100, 115, and 130%) are located in the columns. Baseline conditions are highlighted in orange with a unit of J/kg. Other values are relative differences with respect to the baseline value within the same cluster. Comparisons that are statistically significant ( $p < 0.05$ ) are in bold with a green background for a positive (+) change. Within each cluster, added mass conditions with a higher total amount of added mass sit further to the right, and those with a higher center of added mass sit further away from the bottom.

**Table S1.** Pairwise comparisons: Sagittal plane hip joint quasi-stiffness ( $K_{EX}$ ) during hip extension.

| Speed       |                 | 100% |                    |                    |                    | 115% |                    |                    |                    | 130% |                    |                    |                    |
|-------------|-----------------|------|--------------------|--------------------|--------------------|------|--------------------|--------------------|--------------------|------|--------------------|--------------------|--------------------|
| Young       | Condition       | 00   | 11                 | 12                 | 13                 | 00   | 11                 | 12                 | 13                 | 00   | 11                 | 12                 | 13                 |
|             | Mean            | 2.24 | 2.30               | 2.36               | 2.38               | 2.49 | 2.53               | 2.59               | 2.63               | 2.75 | 2.76               | 2.82               | 2.85               |
|             | SD              | 0.46 | 0.47               | 0.50               | 0.50               | 0.51 | 0.53               | 0.52               | 0.56               | 0.54 | 0.58               | 0.54               | 0.58               |
|             | <i>p</i> -value |      | <b>&lt; 0.0001</b> | <b>&lt; 0.0001</b> | <b>&lt; 0.0001</b> |      | 0.2603             | <b>&lt; 0.0001</b> | <b>&lt; 0.0001</b> |      | <b>&lt; 0.0001</b> | <b>&lt; 0.0001</b> | <b>&lt; 0.0001</b> |
|             | Condition       |      | 21                 | 22                 | 23                 |      | 21                 | 22                 | 23                 |      | 21                 | 22                 | 23                 |
|             | Mean            |      | 2.41               | 2.37               | 2.41               |      | 2.64               | 2.63               | 2.62               |      | 2.94               | 2.90               | 2.91               |
|             | SD              |      | 0.53               | 0.50               | 0.51               |      | 0.54               | 0.50               | 0.57               |      | 0.65               | 0.58               | 0.68               |
|             | <i>p</i> -value |      | <b>&lt; 0.0001</b> | <b>&lt; 0.0001</b> | <b>&lt; 0.0001</b> |      | <b>&lt; 0.0001</b> | <b>&lt; 0.0001</b> | <b>&lt; 0.0001</b> |      | 0.2834             | <b>&lt; 0.0001</b> | <b>&lt; 0.0001</b> |
|             | Condition       |      | 31                 | 32                 | 33                 |      | 31                 | 32                 | 33                 |      | 31                 | 32                 | 33                 |
|             | Mean            |      | 2.44               | 2.41               | 2.50               |      | 2.66               | 2.74               | 2.73               |      | 2.97               | 2.99               | 2.98               |
|             | SD              |      | 0.57               | 0.49               | 0.51               |      | 0.62               | 0.61               | 0.56               |      | 0.69               | 0.72               | 0.66               |
|             | <i>p</i> -value |      | <b>&lt; 0.0001</b> | <b>&lt; 0.0001</b> | <b>&lt; 0.0001</b> |      | <b>&lt; 0.0001</b> | <b>&lt; 0.0001</b> | <b>&lt; 0.0001</b> |      | <b>&lt; 0.0001</b> | <b>&lt; 0.0001</b> | <b>&lt; 0.0001</b> |
| Middle-aged | Condition       | 00   | 11                 | 12                 | 13                 | 00   | 11                 | 12                 | 13                 | 00   | 11                 | 12                 | 13                 |
|             | Mean            | 2.40 | 2.42               | 2.29               | 2.43               | 2.64 | 2.64               | 2.51               | 2.59               | 2.83 | 2.88               | 2.71               | 2.81               |
|             | SD              | 0.75 | 0.71               | 0.64               | 0.66               | 0.78 | 0.75               | 0.66               | 0.59               | 0.80 | 0.77               | 0.67               | 0.62               |
|             | <i>p</i> -value |      | <b>&lt; 0.0001</b> | <b>&lt; 0.0001</b> | <b>&lt; 0.0001</b> |      | 0.9941             | <b>&lt; 0.0001</b> | 0.1408             |      | <b>&lt; 0.0001</b> | 0.7887             | <b>&lt; 0.0001</b> |
|             | Condition       |      | 21                 | 22                 | 23                 |      | 21                 | 22                 | 23                 |      | 21                 | 22                 | 23                 |
|             | Mean            |      | 2.49               | 2.50               | 2.44               |      | 2.74               | 2.70               | 2.65               |      | 2.97               | 2.90               | 2.86               |
|             | SD              |      | 0.67               | 0.70               | 0.70               |      | 0.70               | 0.69               | 0.68               |      | 0.72               | 0.72               | 0.67               |
|             | <i>p</i> -value |      | <b>&lt; 0.0001</b> | <b>&lt; 0.0001</b> | <b>&lt; 0.0001</b> |      | <b>&lt; 0.0001</b> | <b>&lt; 0.0001</b> | 0.8930             |      | <b>&lt; 0.0001</b> | <b>&lt; 0.0001</b> | <b>&lt; 0.0001</b> |
|             | Condition       |      | 31                 | 32                 | 33                 |      | 31                 | 32                 | 33                 |      | 31                 | 32                 | 33                 |
|             | Mean            |      | 2.48               | 2.47               | 2.51               |      | 2.67               | 2.71               | 2.68               |      | 2.88               | 2.88               | 2.92               |
|             | SD              |      | 0.67               | 0.71               | 0.64               |      | 0.68               | 0.72               | 0.71               |      | 0.70               | 0.74               | 0.73               |
|             | <i>p</i> -value |      | <b>&lt; 0.0001</b> | <b>&lt; 0.0001</b> | <b>&lt; 0.0001</b> |      | 0.6567             | <b>&lt; 0.0001</b> | <b>&lt; 0.0001</b> |      | <b>&lt; 0.0001</b> | <b>&lt; 0.0001</b> | <b>&lt; 0.0001</b> |

Mean and SD (Standard deviation) are in Nm/kg/rad. Bold *p*-values < 0.05. Comparisons are with respect to the baseline, “00” condition, within the same speed and age category. Condition names are defined in Table 1.

**Table S2.** Pairwise comparisons: Sagittal plane hip joint quasi-stiffness ( $K_{FL}$ ) during hip flexion.

| Speed       |                 | 100% |          |          |          | 115% |          |          |          | 130% |          |          |          |
|-------------|-----------------|------|----------|----------|----------|------|----------|----------|----------|------|----------|----------|----------|
| Young       | Condition       | 00   | 11       | 12       | 13       | 00   | 11       | 12       | 13       | 00   | 11       | 12       | 13       |
|             | Mean            | 2.42 | 2.20     | 2.21     | 2.26     | 2.82 | 2.51     | 2.52     | 2.65     | 3.40 | 2.96     | 2.95     | 3.05     |
|             | SD              | 0.66 | 0.58     | 0.60     | 0.63     | 0.75 | 0.66     | 0.63     | 0.66     | 0.94 | 0.74     | 0.82     | 0.79     |
|             | <i>p</i> -value | -    | < 0.0001 | < 0.0001 | < 0.0001 | -    | < 0.0001 | < 0.0001 | < 0.0001 | -    | < 0.0001 | < 0.0001 | < 0.0001 |
|             | Condition       |      | 21       | 22       | 23       |      | 21       | 22       | 23       |      | 21       | 22       | 23       |
|             | Mean            |      | 2.16     | 2.20     | 2.17     |      | 2.55     | 2.50     | 2.47     |      | 2.93     | 2.93     | 3.02     |
|             | SD              |      | 0.68     | 0.63     | 0.62     |      | 0.74     | 0.68     | 0.75     |      | 0.89     | 0.80     | 1.07     |
|             | <i>p</i> -value |      | < 0.0001 | < 0.0001 | < 0.0001 |      | < 0.0001 | < 0.0001 | < 0.0001 |      | < 0.0001 | < 0.0001 | < 0.0001 |
|             | Condition       |      | 31       | 32       | 33       |      | 31       | 32       | 33       |      | 31       | 32       | 33       |
|             | Mean            |      | 2.19     | 2.19     | 2.25     |      | 2.49     | 2.46     | 2.48     |      | 2.86     | 2.84     | 2.88     |
|             | SD              |      | 0.69     | 0.62     | 0.70     |      | 0.79     | 0.60     | 0.90     |      | 0.84     | 0.82     | 0.99     |
|             | <i>p</i> -value |      | < 0.0001 | < 0.0001 | < 0.0001 |      | < 0.0001 | < 0.0001 | < 0.0001 |      | < 0.0001 | < 0.0001 | < 0.0001 |
| Middle-aged | Condition       | 00   | 11       | 12       | 13       | 00   | 11       | 12       | 13       | 00   | 11       | 12       | 13       |
|             | Mean            | 2.92 | 2.86     | 2.89     | 2.92     | 3.30 | 3.25     | 3.32     | 3.35     | 3.78 | 3.71     | 3.71     | 3.78     |
|             | SD              | 1.11 | 0.94     | 0.94     | 1.02     | 1.21 | 1.06     | 1.05     | 1.11     | 1.33 | 1.21     | 1.20     | 1.20     |
|             | <i>p</i> -value |      | 0.4786   | 0.9220   | 0.9948   | -    | 0.7780   | 0.9224   | 0.6401   | -    | < 0.0001 | 0.0707   | 0.9980   |
|             | Condition       |      | 21       | 22       | 23       |      | 21       | 22       | 23       |      | 21       | 22       | 23       |
|             | Mean            |      | 2.86     | 2.78     | 2.98     |      | 3.19     | 3.19     | 3.40     |      | 3.66     | 3.66     | 3.92     |
|             | SD              |      | 0.95     | 0.93     | 1.08     |      | 1.01     | 1.05     | 1.18     |      | 1.15     | 1.16     | 1.34     |
|             | <i>p</i> -value |      | 0.5404   | < 0.0001 | 0.5951   |      | < 0.0001 | < 0.0001 | < 0.0001 |      | < 0.0001 | < 0.0001 | < 0.0001 |
|             | Condition       |      | 31       | 32       | 33       |      | 31       | 32       | 33       |      | 31       | 32       | 33       |
|             | Mean            |      | 2.86     | 2.83     | 2.92     |      | 3.16     | 3.28     | 3.31     |      | 3.61     | 3.67     | 3.79     |
|             | SD              |      | 0.97     | 0.94     | 0.93     |      | 1.00     | 1.07     | 1.01     |      | 1.14     | 1.20     | 1.18     |
|             | <i>p</i> -value |      | < 0.0001 | 0.0020   | 0.9981   |      | < 0.0001 | 0.9407   | < 0.0001 |      | < 0.0001 | < 0.0001 | < 0.0001 |

Mean and SD (Standard deviation) are in Nm/kg/rad. Bold *p*-values < 0.05. Comparisons are with respect to the baseline, “00” condition, within the same speed and age category. Condition names are defined in Table 1.

**Table S3.** Pairwise comparisons: Sagittal plane hip joint mechanical work ( $W_{EX}$ ) during hip extension.

| Speed       |                 | 100%  |          |          |          | 115%  |          |          |          | 130%  |          |          |          |
|-------------|-----------------|-------|----------|----------|----------|-------|----------|----------|----------|-------|----------|----------|----------|
| Young       | Condition       | 00    | 11       | 12       | 13       | 00    | 11       | 12       | 13       | 00    | 11       | 12       | 13       |
|             | Mean            | -0.06 | -0.06    | -0.06    | -0.06    | -0.07 | -0.07    | -0.07    | -0.08    | -0.09 | -0.09    | -0.09    | -0.09    |
|             | SD              | 0.03  | 0.03     | 0.03     | 0.03     | 0.03  | 0.03     | 0.03     | 0.03     | 0.03  | 0.04     | 0.04     | 0.04     |
|             | <i>p</i> -value |       | < 0.0001 | < 0.0001 | < 0.0001 |       | 0.4534   | 0.0002   | < 0.0001 |       | < 0.0001 | < 0.0001 | < 0.0001 |
|             | Condition       |       | 21       | 22       | 23       |       | 21       | 22       | 23       |       | 21       | 22       | 23       |
|             | Mean            |       | -0.07    | -0.07    | -0.07    |       | -0.09    | -0.08    | -0.08    |       | -0.10    | -0.10    | -0.09    |
|             | SD              |       | 0.04     | 0.03     | 0.03     |       | 0.05     | 0.04     | 0.04     |       | 0.05     | 0.04     | 0.04     |
|             | <i>p</i> -value |       | < 0.0001 | < 0.0001 | < 0.0001 |       | < 0.0001 | < 0.0001 | < 0.0001 |       | < 0.0001 | < 0.0001 | < 0.0001 |
|             | Condition       |       | 31       | 32       | 33       |       | 31       | 32       | 33       |       | 31       | 32       | 33       |
|             | Mean            |       | -0.07    | -0.07    | -0.06    |       | -0.09    | -0.09    | -0.07    |       | -0.10    | -0.09    | -0.09    |
|             | SD              |       | 0.05     | 0.03     | 0.03     |       | 0.05     | 0.08     | 0.04     |       | 0.05     | 0.04     | 0.04     |
|             | <i>p</i> -value |       | < 0.0001 | < 0.0001 | < 0.0001 |       | < 0.0001 | < 0.0001 | < 0.0001 |       | < 0.0001 | < 0.0001 | < 0.0001 |
| Middle-aged | Condition       | 00    | 11       | 12       | 13       | 00    | 11       | 12       | 13       | 00    | 11       | 12       | 13       |
|             | Mean            | -0.06 | -0.07    | -0.08    | -0.07    | -0.07 | -0.08    | -0.09    | -0.08    | -0.08 | -0.09    | -0.10    | -0.10    |
|             | SD              | 0.07  | 0.08     | 0.08     | 0.08     | 0.07  | 0.08     | 0.08     | 0.08     | 0.07  | 0.08     | 0.08     | 0.08     |
|             | <i>p</i> -value |       | < 0.0001 | < 0.0001 | < 0.0001 |       | < 0.0001 | < 0.0001 | < 0.0001 |       | < 0.0001 | < 0.0001 | < 0.0001 |
|             | Condition       |       | 21       | 22       | 23       |       | 21       | 22       | 23       |       | 21       | 22       | 23       |
|             | Mean            |       | -0.07    | -0.07    | -0.07    |       | -0.08    | -0.09    | -0.09    |       | -0.10    | -0.10    | -0.10    |
|             | SD              |       | 0.07     | 0.07     | 0.08     |       | 0.07     | 0.08     | 0.08     |       | 0.07     | 0.08     | 0.08     |
|             | <i>p</i> -value |       | < 0.0001 | < 0.0001 | < 0.0001 |       | < 0.0001 | < 0.0001 | < 0.0001 |       | < 0.0001 | < 0.0001 | < 0.0001 |
|             | Condition       |       | 31       | 32       | 33       |       | 31       | 32       | 33       |       | 31       | 32       | 33       |
|             | Mean            |       | -0.08    | -0.07    | -0.08    |       | -0.09    | -0.09    | -0.09    |       | -0.10    | -0.10    | -0.10    |
|             | SD              |       | 0.08     | 0.07     | 0.08     |       | 0.07     | 0.07     | 0.08     |       | 0.07     | 0.08     | 0.07     |
|             | <i>p</i> -value |       | < 0.0001 | < 0.0001 | < 0.0001 |       | < 0.0001 | < 0.0001 | < 0.0001 |       | < 0.0001 | < 0.0001 | < 0.0001 |

Mean and SD (Standard deviation) are in J/kg. Bold *p*-values < 0.05. Comparisons are with respect to the baseline, “00” condition, within the same speed and age category. Condition names are defined in Table 1.

**Table S4.** Pairwise comparisons: Sagittal plane hip joint mechanical work ( $W_{FL}$ ) during hip flexion.

| Speed       |                 | 100% |                    |                    |                    | 115% |                    |                    |                    | 130% |                    |                    |                    |
|-------------|-----------------|------|--------------------|--------------------|--------------------|------|--------------------|--------------------|--------------------|------|--------------------|--------------------|--------------------|
| Young       | Condition       | 00   | 11                 | 12                 | 13                 | 00   | 11                 | 12                 | 13                 | 00   | 11                 | 12                 | 13                 |
|             | Mean            | 0.04 | 0.04               | 0.04               | 0.04               | 0.05 | 0.06               | 0.06               | 0.06               | 0.06 | 0.07               | 0.07               | 0.07               |
|             | SD              | 0.01 | 0.02               | 0.02               | 0.02               | 0.02 | 0.02               | 0.02               | 0.03               | 0.02 | 0.03               | 0.03               | 0.03               |
|             | <i>p</i> -value |      | <b>&lt; 0.0001</b> | <b>&lt; 0.0001</b> | <b>&lt; 0.0001</b> |      | <b>&lt; 0.0001</b> | <b>&lt; 0.0001</b> | <b>&lt; 0.0001</b> |      | <b>&lt; 0.0001</b> | <b>&lt; 0.0001</b> | <b>&lt; 0.0001</b> |
|             | Condition       |      | 21                 | 22                 | 23                 |      | 21                 | 22                 | 23                 |      | 21                 | 22                 | 23                 |
|             | Mean            |      | 0.05               | 0.05               | 0.05               |      | 0.06               | 0.06               | 0.06               |      | 0.07               | 0.07               | 0.07               |
|             | SD              |      | 0.02               | 0.02               | 0.02               |      | 0.02               | 0.02               | 0.02               |      | 0.03               | 0.03               | 0.03               |
|             | <i>p</i> -value |      | <b>&lt; 0.0001</b> | <b>&lt; 0.0001</b> | <b>&lt; 0.0001</b> |      | <b>&lt; 0.0001</b> | <b>&lt; 0.0001</b> | <b>&lt; 0.0001</b> |      | <b>&lt; 0.0001</b> | <b>&lt; 0.0001</b> | <b>&lt; 0.0001</b> |
|             | Condition       |      | 31                 | 32                 | 33                 |      | 31                 | 32                 | 33                 |      | 31                 | 32                 | 33                 |
|             | Mean            |      | 0.05               | 0.05               | 0.05               |      | 0.06               | 0.07               | 0.06               |      | 0.08               | 0.08               | 0.08               |
|             | SD              |      | 0.02               | 0.02               | 0.02               |      | 0.03               | 0.03               | 0.03               |      | 0.03               | 0.03               | 0.03               |
|             | <i>p</i> -value |      | <b>&lt; 0.0001</b> | <b>&lt; 0.0001</b> | <b>&lt; 0.0001</b> |      | <b>&lt; 0.0001</b> | <b>&lt; 0.0001</b> | <b>&lt; 0.0001</b> |      | <b>&lt; 0.0001</b> | <b>&lt; 0.0001</b> | <b>&lt; 0.0001</b> |
| Middle-aged | Condition       | 00   | 11                 | 12                 | 13                 | 00   | 11                 | 12                 | 13                 | 00   | 11                 | 12                 | 13                 |
|             | Mean            | 0.05 | 0.05               | 0.05               | 0.05               | 0.06 | 0.06               | 0.06               | 0.06               | 0.07 | 0.08               | 0.08               | 0.08               |
|             | SD              | 0.03 | 0.02               | 0.03               | 0.02               | 0.03 | 0.03               | 0.03               | 0.03               | 0.03 | 0.03               | 0.03               | 0.04               |
|             | <i>p</i> -value |      | <b>&lt; 0.0001</b> | <b>&lt; 0.0001</b> | 0.7479             |      | <b>&lt; 0.0001</b> | <b>&lt; 0.0001</b> | <b>&lt; 0.0001</b> |      | <b>&lt; 0.0001</b> | <b>&lt; 0.0001</b> | <b>&lt; 0.0001</b> |
|             | Condition       |      | 21                 | 22                 | 23                 |      | 21                 | 22                 | 23                 |      | 21                 | 22                 | 23                 |
|             | Mean            |      | 0.05               | 0.05               | 0.05               |      | 0.07               | 0.06               | 0.06               |      | 0.08               | 0.08               | 0.08               |
|             | SD              |      | 0.03               | 0.03               | 0.03               |      | 0.03               | 0.03               | 0.03               |      | 0.04               | 0.03               | 0.04               |
|             | <i>p</i> -value |      | <b>&lt; 0.0001</b> | <b>&lt; 0.0001</b> | <b>&lt; 0.0001</b> |      | <b>&lt; 0.0001</b> | <b>&lt; 0.0001</b> | <b>&lt; 0.0001</b> |      | <b>&lt; 0.0001</b> | <b>&lt; 0.0001</b> | <b>&lt; 0.0001</b> |
|             | Condition       |      | 31                 | 32                 | 33                 |      | 31                 | 32                 | 33                 |      | 31                 | 32                 | 33                 |
|             | Mean            |      | 0.06               | 0.05               | 0.05               |      | 0.07               | 0.06               | 0.07               |      | 0.08               | 0.08               | 0.08               |
|             | SD              |      | 0.03               | 0.03               | 0.03               |      | 0.03               | 0.03               | 0.03               |      | 0.04               | 0.03               | 0.04               |
|             | <i>p</i> -value |      | <b>&lt; 0.0001</b> | <b>&lt; 0.0001</b> | <b>&lt; 0.0001</b> |      | <b>&lt; 0.0001</b> | <b>&lt; 0.0001</b> | <b>&lt; 0.0001</b> |      | <b>&lt; 0.0001</b> | <b>&lt; 0.0001</b> | <b>&lt; 0.0001</b> |

Mean and SD (Standard deviation) are in J/kg. Bold *p*-values < 0.05. Comparisons are with respect to the baseline, “00” condition, within the same speed and age category. Condition names are defined in Table 1.

**Table S5.** Sagittal plane hip joint quasi-stiffness ( $K_{EX}$ ) for each participant during hip extension.

| Participant | Gender | Age | Age category | Body mass    | Body height | # $K_{EX}$  | Mean $R^2$  | Mean RMSE    | #Frames   | $K_{EX}$ range | Mean $W_{EX}$ |
|-------------|--------|-----|--------------|--------------|-------------|-------------|-------------|--------------|-----------|----------------|---------------|
| 1           | M      | 22  | Y            | 76.35        | 1.73        | 3144        | 0.93        | 0.074        | 36        | [1.560, 4.620] | -0.101        |
| 2           | M      | 23  | Y            | 67.30        | 1.75        | 3064        | 0.96        | 0.044        | 32        | [1.324, 3.229] | -0.059        |
| 3           | F      | 23  | Y            | 68.71        | 1.78        | 2224        | 0.95        | 0.039        | 35        | [1.077, 6.437] | -0.093        |
| 4           | M      | 20  | Y            | 56.71        | 1.78        | 2697        | 0.88        | 0.122        | 41        | [1.586, 4.095] | -0.074        |
| 5           | F      | 53  | M            | 74.84        | 1.65        | 3040        | 0.96        | 0.044        | 31        | [1.380, 4.230] | -0.072        |
| 6           | F      | 23  | Y            | 79.66        | 1.63        | 3530        | 0.93        | 0.064        | 29        | [1.309, 5.703] | -0.080        |
| 7           | F      | 37  | M            | 76.45        | 1.56        | 3350        | 0.90        | 0.077        | 43        | [1.457, 3.094] | -0.091        |
| 8           | M      | 31  | Y            | 68.94        | 1.83        | 3120        | 0.97        | 0.049        | 33        | [2.540, 4.977] | -0.064        |
| 9           | F      | 36  | M            | 68.94        | 1.63        | 3368        | 0.95        | 0.054        | 39        | [1.528, 4.026] | -0.102        |
| 10          | M      | 41  | M            | 76.37        | 1.82        | 3340        | 0.88        | 0.117        | 34        | [2.884, 5.423] | -0.061        |
| 11          | F      | 36  | M            | 85.33        | 1.71        | 3121        | 0.81        | 0.144        | 46        | [1.164, 3.383] | -0.081        |
| 12          | F      | 41  | M            | 71.78        | 1.70        | 3144        | 0.88        | 0.077        | 38        | [1.402, 2.939] | -0.046        |
| 13          | M      | 54  | M            | 102.84       | 1.83        | 2413        | 0.92        | 0.089        | 51        | [1.415, 2.832] | -0.134        |
| 14          | M      | 40  | M            | 89.48        | 1.71        | 3270        | 0.90        | 0.090        | 34        | [2.388, 5.779] | -0.054        |
| 15          | F      | 20  | Y            | 62.22        | 1.65        | 2194        | 0.92        | 0.058        | 47        | [1.291, 2.877] | -0.034        |
| 16          | F      | 18  | Y            | 67.08        | 1.71        | 2453        | 0.96        | 0.053        | 36        | [1.695, 3.946] | -0.092        |
| 17          | M      | 19  | Y            | 73.80        | 1.80        | 2614        | 0.96        | 0.036        | 29        | [1.899, 4.662] | -0.054        |
| 18          | M      | 18  | Y            | 67.81        | 1.69        | 3063        | 0.94        | 0.069        | 44        | [1.351, 3.227] | -0.135        |
| 19          | F      | 22  | Y            | 70.31        | 1.63        | 3057        | 0.97        | 0.029        | 27        | [1.682, 4.094] | -0.030        |
| 20          | F      | 38  | M            | 53.77        | 1.68        | 2808        | 0.93        | 0.071        | 41        | [1.067, 3.088] | -0.047        |
| 21          | F      | 37  | M            | 54.84        | 1.59        | 3371        | 0.90        | 0.091        | 31        | [1.580, 5.197] | -0.098        |
| 22          | F      | 38  | M            | 59.01        | 1.68        | 2935        | 0.95        | 0.051        | 34        | [1.704, 4.086] | -0.042        |
| 23          | F      | 43  | M            | 64.09        | 1.73        | 2748        | 0.92        | 0.109        | 46        | [1.745, 3.810] | -0.356        |
| 24          | M      | 60  | M            | 79.48        | 1.83        | 2317        | 0.96        | 0.031        | 25        | [1.047, 5.580] | -0.038        |
| 25          | M      | 27  | Y            | 64.09        | 1.80        | 2908        | 0.93        | 0.078        | 46        | [1.332, 3.100] | -0.129        |
| 26          | F      | 44  | M            | 56.20        | 1.57        | 2520        | 0.97        | 0.024        | 35        | [0.873, 3.583] | -0.021        |
| 27          | M      | 61  | M            | 92.28        | 1.82        | 2995        | 0.97        | 0.026        | 20        | [1.603, 6.040] | -0.029        |
| 28          | M      | 55  | M            | 79.62        | 1.71        | 2945        | 0.95        | 0.068        | 34        | [1.893, 5.141] | -0.112        |
| 29          | M      | 27  | Y            | 88.67        | 1.77        | 3083        | 0.92        | 0.064        | 38        | [1.646, 3.827] | -0.065        |
| <b>Mean</b> |        |     |              | <b>72.83</b> | <b>1.71</b> | <b>2820</b> | <b>0.93</b> | <b>0.068</b> | <b>36</b> | <b>2.651</b>   | <b>-0.082</b> |
| <b>SD</b>   |        |     |              | <b>12.86</b> | <b>0.08</b> | <b>509</b>  | <b>0.05</b> | <b>0.037</b> | <b>8</b>  | <b>0.675</b>   | <b>0.063</b>  |

Body mass in kilograms;

Body height in meters;

Age category: Y for young adults, and M for middle-aged adults;

# $K_{EX}$ : Number of hip joint quasi-stiffness values during hip extension, both sides included;Mean  $R^2$ : Mean R-squared value of the curve fitting;

Mean RMSE: Mean root mean squared error of the curve fitting (Nm/kg);

#Frames: Average number of frames used for the curve fitting for each  $K_{EX}$  value; $K_{EX}$  range: Range of  $K_{EX}$  (Nm/kg/rad);Mean  $W_{EX}$ : Average mechanical work at the hip joint during hip extension (J/kg);

SD: Standard deviation;

Sampling frequency: 150 Hz.

**Table S6.** Sagittal plane hip joint quasi-stiffness ( $K_{FL}$ ) for each participant during hip flexion.

| Participant | Gender | Age | Age category | Body mass    | Body height | # $K_{FL}$  | Mean $R^2$  | Mean RMSE    | #Frames   | $K_{FL}$ range | Mean $W_{FL}$ |
|-------------|--------|-----|--------------|--------------|-------------|-------------|-------------|--------------|-----------|----------------|---------------|
| 1           | M      | 22  | Y            | 76.35        | 1.73        | 3144        | 0.89        | 0.106        | 16        | [1.516, 8.060] | 0.050         |
| 2           | M      | 23  | Y            | 67.30        | 1.75        | 3064        | 0.91        | 0.069        | 19        | [0.612, 3.974] | 0.054         |
| 3           | F      | 23  | Y            | 68.71        | 1.78        | 2224        | 0.88        | 0.075        | 25        | [0.388, 4.718] | 0.066         |
| 4           | M      | 20  | Y            | 56.71        | 1.78        | 2697        | 0.80        | 0.133        | 21        | [0.950, 4.334] | 0.091         |
| 5           | F      | 53  | M            | 74.84        | 1.65        | 3040        | 0.93        | 0.071        | 18        | [1.009, 5.211] | 0.064         |
| 6           | F      | 23  | Y            | 79.66        | 1.63        | 3530        | 0.91        | 0.071        | 17        | [1.251, 6.082] | 0.076         |
| 7           | F      | 37  | M            | 76.45        | 1.56        | 3350        | 0.94        | 0.074        | 17        | [1.829, 4.371] | 0.058         |
| 8           | M      | 31  | Y            | 68.94        | 1.83        | 3120        | 0.86        | 0.094        | 22        | [0.654, 4.098] | 0.081         |
| 9           | F      | 36  | M            | 68.94        | 1.63        | 3368        | 0.94        | 0.079        | 18        | [2.092, 6.288] | 0.072         |
| 10          | M      | 41  | M            | 76.37        | 1.82        | 3340        | 0.93        | 0.101        | 20        | [3.291, 7.604] | 0.064         |
| 11          | F      | 36  | M            | 85.33        | 1.71        | 3121        | 0.96        | 0.070        | 20        | [1.627, 4.172] | 0.104         |
| 12          | F      | 41  | M            | 71.78        | 1.70        | 3144        | 0.96        | 0.053        | 18        | [2.069, 6.303] | 0.040         |
| 13          | M      | 54  | M            | 102.84       | 1.83        | 2413        | 0.83        | 0.137        | 19        | [1.675, 6.910] | 0.050         |
| 14          | M      | 40  | M            | 89.48        | 1.71        | 3270        | 0.86        | 0.094        | 17        | [1.583, 8.252] | 0.046         |
| 15          | F      | 20  | Y            | 62.22        | 1.65        | 2194        | 0.89        | 0.066        | 23        | [1.026, 2.731] | 0.045         |
| 16          | F      | 18  | Y            | 67.08        | 1.71        | 2453        | 0.95        | 0.062        | 21        | [1.534, 3.921] | 0.100         |
| 17          | M      | 19  | Y            | 73.80        | 1.80        | 2614        | 0.94        | 0.060        | 20        | [1.532, 4.186] | 0.044         |
| 18          | M      | 18  | Y            | 67.81        | 1.69        | 3063        | 0.84        | 0.129        | 22        | [1.402, 5.513] | 0.060         |
| 19          | F      | 22  | Y            | 70.31        | 1.63        | 3057        | 0.76        | 0.092        | 20        | [0.679, 3.506] | 0.024         |
| 20          | F      | 38  | M            | 53.77        | 1.68        | 2808        | 0.82        | 0.118        | 21        | [1.038, 9.157] | 0.063         |
| 21          | F      | 37  | M            | 54.84        | 1.59        | 3371        | 0.96        | 0.065        | 19        | [1.764, 5.019] | 0.093         |
| 22          | F      | 38  | M            | 59.01        | 1.68        | 2935        | 0.89        | 0.092        | 18        | [0.982, 7.018] | 0.036         |
| 23          | F      | 43  | M            | 64.09        | 1.73        | 2748        | 0.93        | 0.153        | 20        | [3.589, 7.387] | 0.109         |
| 24          | M      | 60  | M            | 79.48        | 1.83        | 2318        | 0.95        | 0.058        | 21        | [0.576, 4.300] | 0.056         |
| 25          | M      | 27  | Y            | 64.09        | 1.80        | 2908        | 0.88        | 0.128        | 21        | [1.951, 6.715] | 0.040         |
| 26          | F      | 44  | M            | 56.20        | 1.57        | 2520        | 0.85        | 0.058        | 22        | [0.560, 2.773] | 0.014         |
| 27          | M      | 61  | M            | 92.28        | 1.82        | 2999        | 0.95        | 0.038        | 15        | [1.419, 5.281] | 0.026         |
| 28          | M      | 55  | M            | 79.62        | 1.71        | 2945        | 0.96        | 0.068        | 17        | [1.978, 6.334] | 0.117         |
| 29          | M      | 27  | Y            | 88.67        | 1.77        | 3083        | 0.87        | 0.099        | 21        | [1.436, 5.582] | 0.044         |
| <b>Mean</b> |        |     |              | <b>72.83</b> | <b>1.71</b> | <b>2884</b> | <b>0.90</b> | <b>0.086</b> | <b>20</b> | <b>2.999</b>   | <b>0.062</b>  |
| <b>SD</b>   |        |     |              | <b>12.86</b> | <b>0.08</b> | <b>388</b>  | <b>0.07</b> | <b>0.036</b> | <b>3</b>  | <b>1.083</b>   | <b>0.031</b>  |

Body mass in kilograms;

Body height in meters;

Age category: Y for young adults, and M for middle-aged adults;

# $K_{FL}$ : Number of hip joint quasi-stiffness values during hip flexion, both sides included;Mean  $R^2$ : Mean R-squared value of the curve fitting;

Mean RMSE: Mean root mean squared error of the curve fitting (Nm/kg);

#Frames: Average number of frames used for the curve fitting for each  $K_{FL}$  value; $K_{FL}$  range: Range of  $K_{FL}$  (Nm/kg/rad);Mean  $W_{FL}$ : Average mechanical work at the hip joint during hip flexion (J/kg);

SD: Standard deviation;

Sampling frequency: 150 Hz
